# Supplementary material
Source: publisher figshare collection journal article supplement (https://acs.figshare.com/ndownloader/files/24557232)
Supplement: Supplementary file 1 [file 24557232]

*Supporting Information*

**Silicon-Doped Argyrodite Solid Electrolyte  $\text{Li}_6\text{PS}_5\text{I}$  with Improved Ionic Conductivity and Interfacial Compatibility for High-Performance All-Solid-State Lithium Batteries**

*Jun Zhang,<sup>‡</sup> Lujie Li,<sup>‡</sup> Chao Zheng, Yang Xia, Yongping Gan, Hui Huang, Chu Liang, Xinpeng He,  
Xinyong Tao and Wenkui Zhang\**

College of Materials Science and Engineering, Zhejiang University of Technology, Hangzhou  
310014, P.R. China.

<sup>‡</sup>J. Zhang and L. Li contributed equally to this work.

\*Corresponding author. E-mail: msechem@zjut.edu.cn

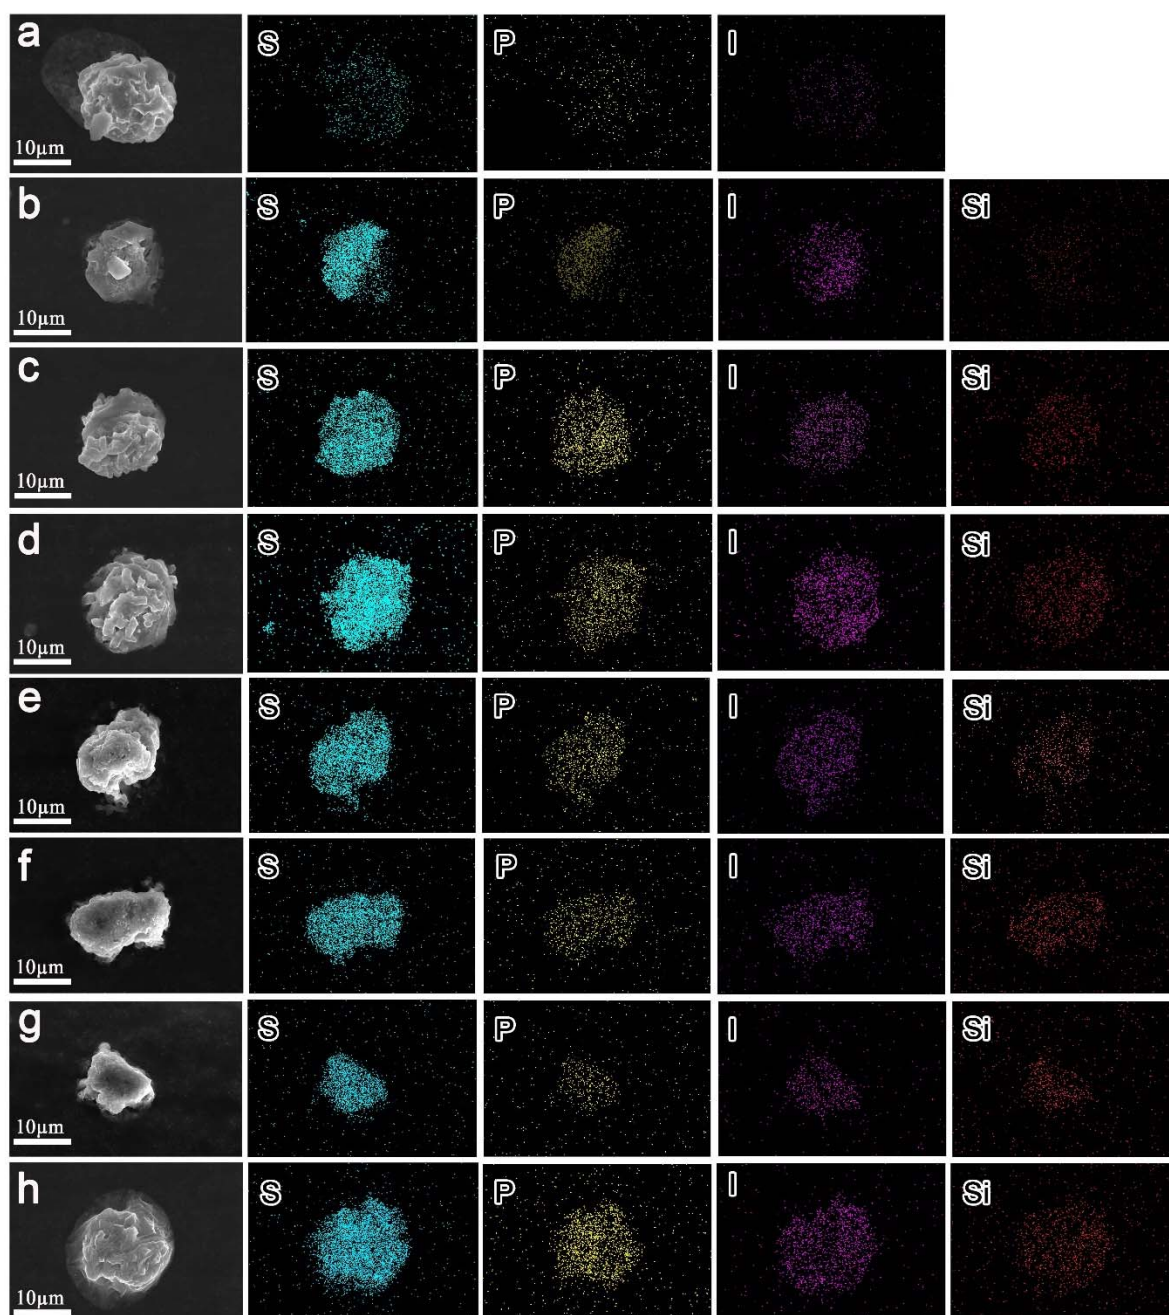

**Figure S1.** SEM images of (a)  $\text{Li}_6\text{PS}_5\text{I}$ , (b-h)  $\text{Li}_{6+x}\text{P}_{1-x}\text{Si}_x\text{S}_5\text{I}$  ( $0.1 \leq x \leq 0.6$ ) powders and the corresponding element mapping.

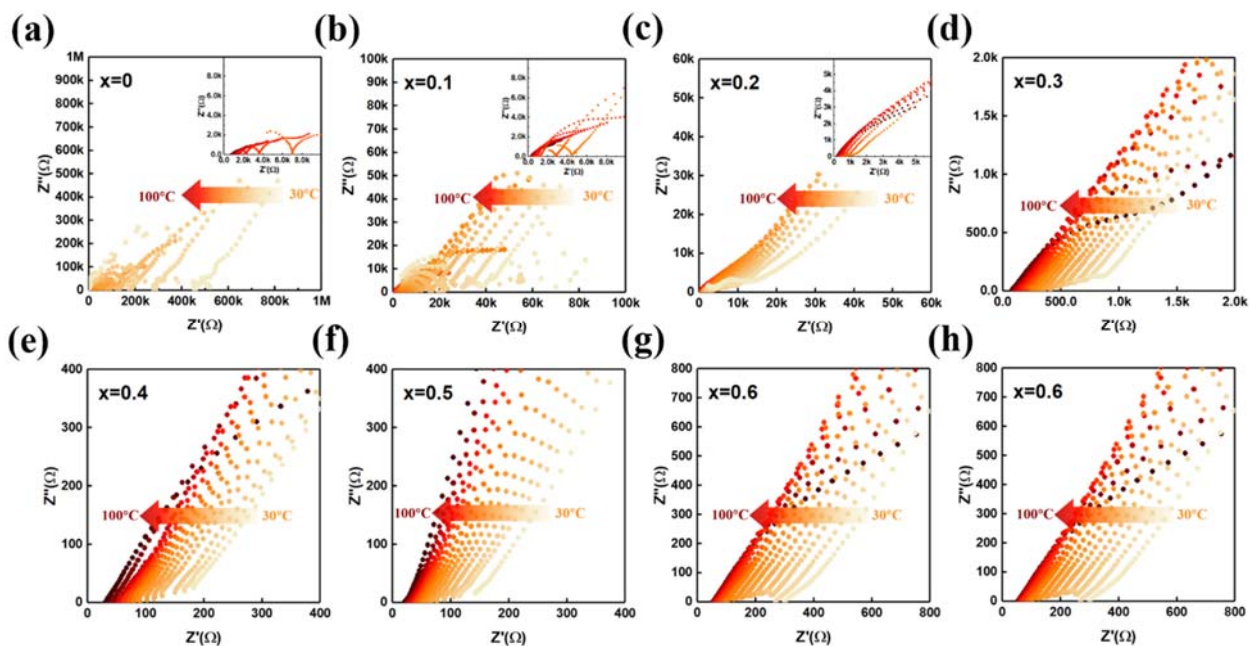

**Figure S2.** Nyquist plots of the (a)  $\text{Li}_6\text{PS}_5\text{I}$  ( $x = 0$ ), (b-h)  $\text{Li}_{6+x}\text{P}_{1-x}\text{Si}_x\text{S}_5\text{I}$  ( $0.1 \leq x \leq 0.6$ ) samples measured from 30 °C to 100 °C, respectively.

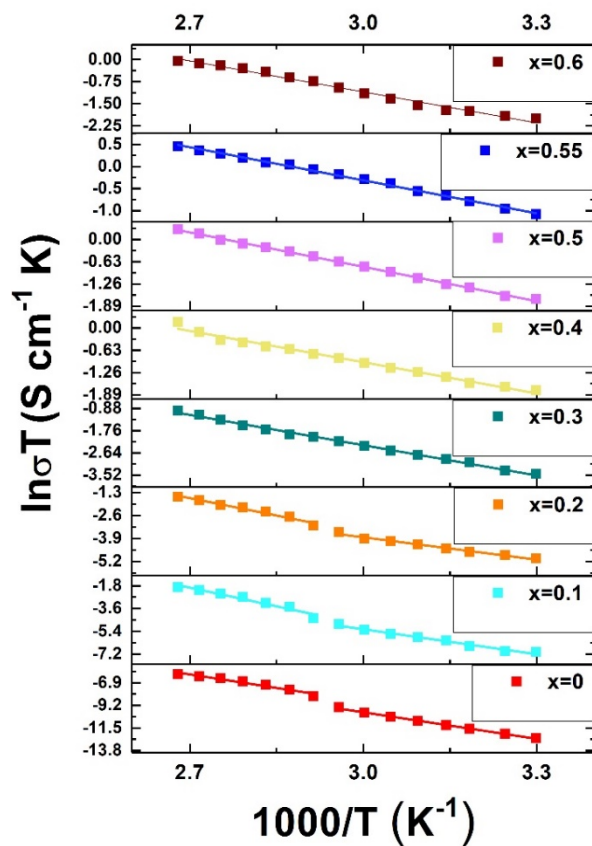

**Figure S3.** Arrhenius curves for activation energy of  $\text{Li}_{6+x}\text{P}_{1-x}\text{Si}_x\text{S}_5\text{I}$  ( $0 \leq x \leq 0.6$ ) samples.

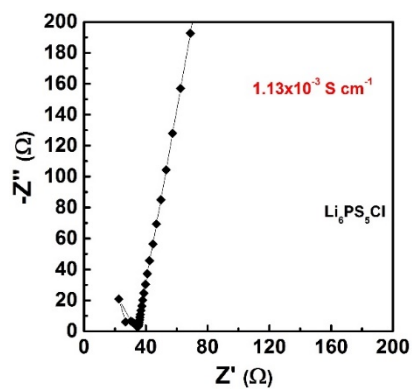

**Figure S4.** Nyquist plots of  $\text{Li}_6\text{PS}_5\text{Cl}$  sample measured at 30 °C.

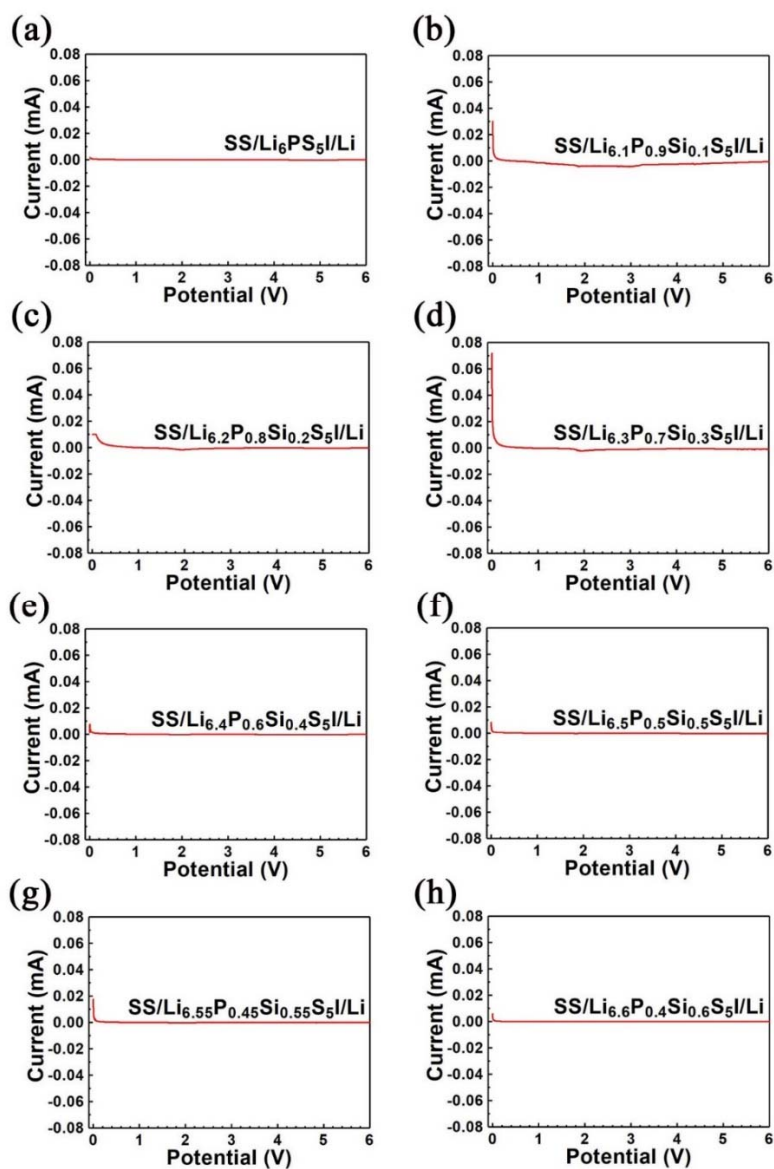

**Figure S5.** Linear sweep voltammogram (LSV) profile of (a)  $\text{Li}_6\text{PS}_5\text{I}$ , (b-h)  $\text{Li}_{6+x}\text{P}_{1-x}\text{Si}_x\text{S}_5\text{I}$  ( $0.1 \leq x \leq 0.6$ ) samples at a scan rate of  $0.1 \text{ mV s}^{-1}$ , respectively.

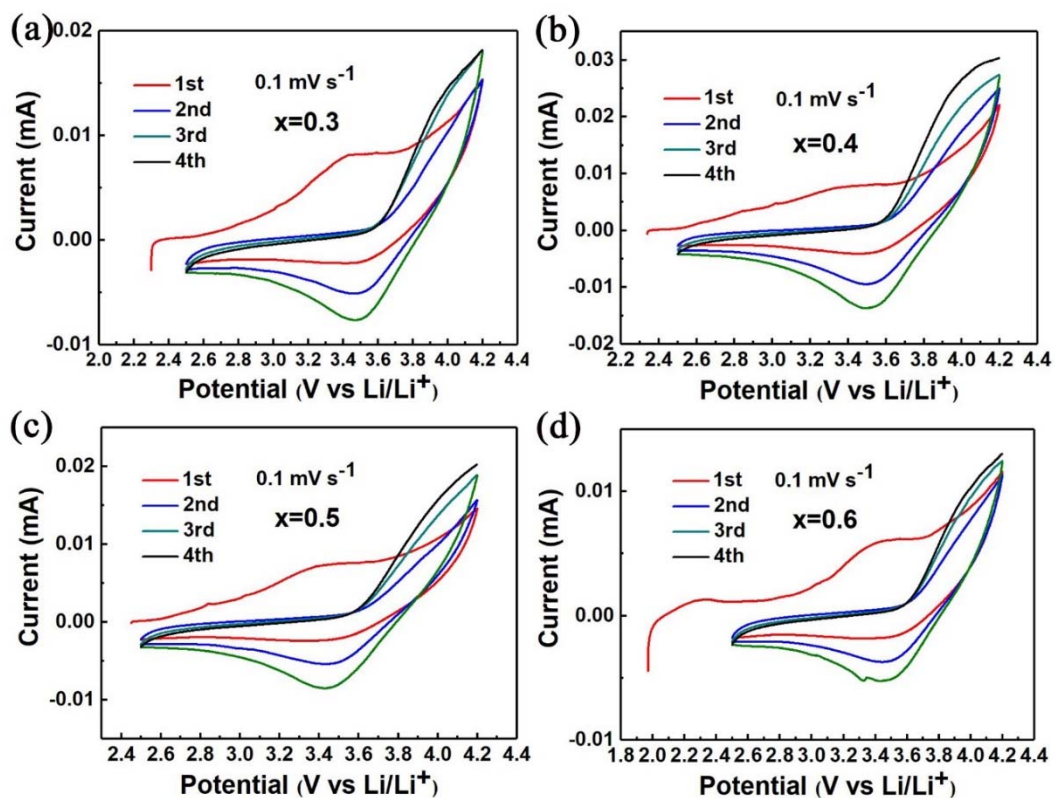

**Figure S6.** CV curves of the (a-d)  $\text{Li}_{6+x}\text{P}_{1-x}\text{Si}_x\text{S}_5\text{I}$  ( $0.3 \leq x \leq 0.6$ ) of NCM- $\text{Li}_6\text{PS}_5\text{Cl}$ /  $\text{Li}_{6+x}\text{P}_{1-x}\text{Si}_x\text{S}_5\text{I}$ / Li ASSLBs at a scan rate of  $0.1 \text{ mV s}^{-1}$ .

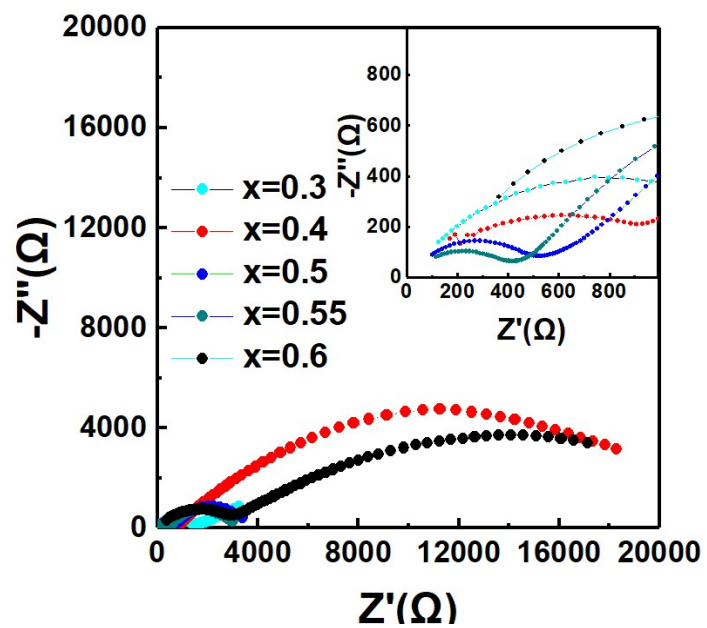

**Figure S7.** Impedance spectra of NCM-Li<sub>6</sub>PS<sub>5</sub>Cl/ Li<sub>6+x</sub>P<sub>1-x</sub>Si<sub>x</sub>S<sub>5</sub>I (x = 0.3, 0.4, 0.5 and 0.6)/ Li ASSLBs after 300 cycles.



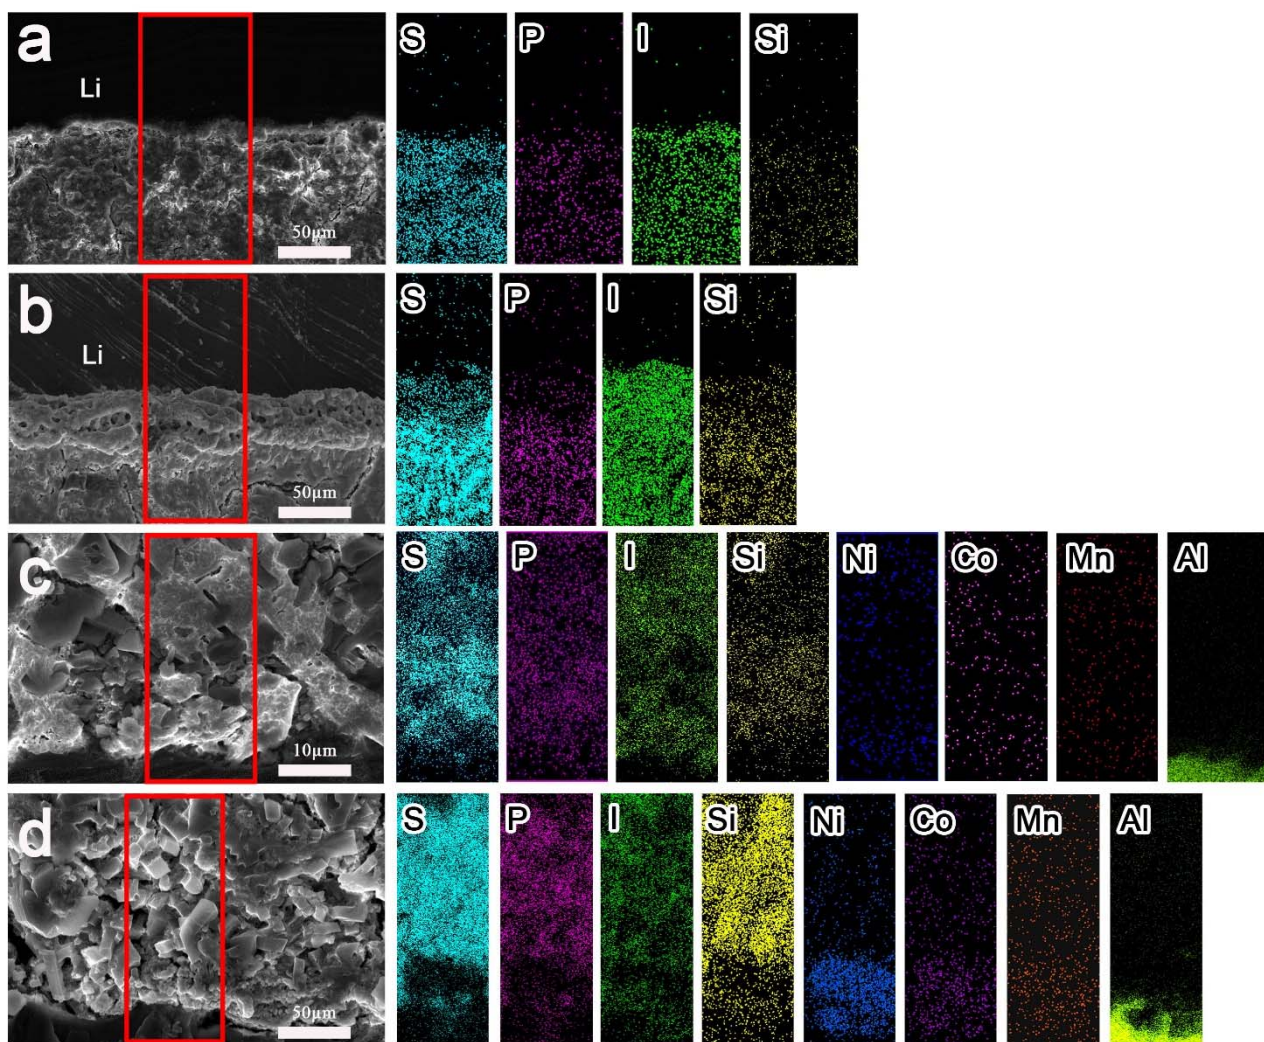

**Figure S8.** The cross-sectional SEM images and the corresponding elemental mappings of the interface of  $\text{Li}_{6.55}\text{P}_{0.45}\text{Si}_{0.55}\text{S}_5\text{I}$  SE/Li before (a) and after cycling (b);  $\text{Li}_{6.55}\text{P}_{0.45}\text{Si}_{0.55}\text{S}_5\text{I}$  SE/NCM before (c) and after cycling (d).

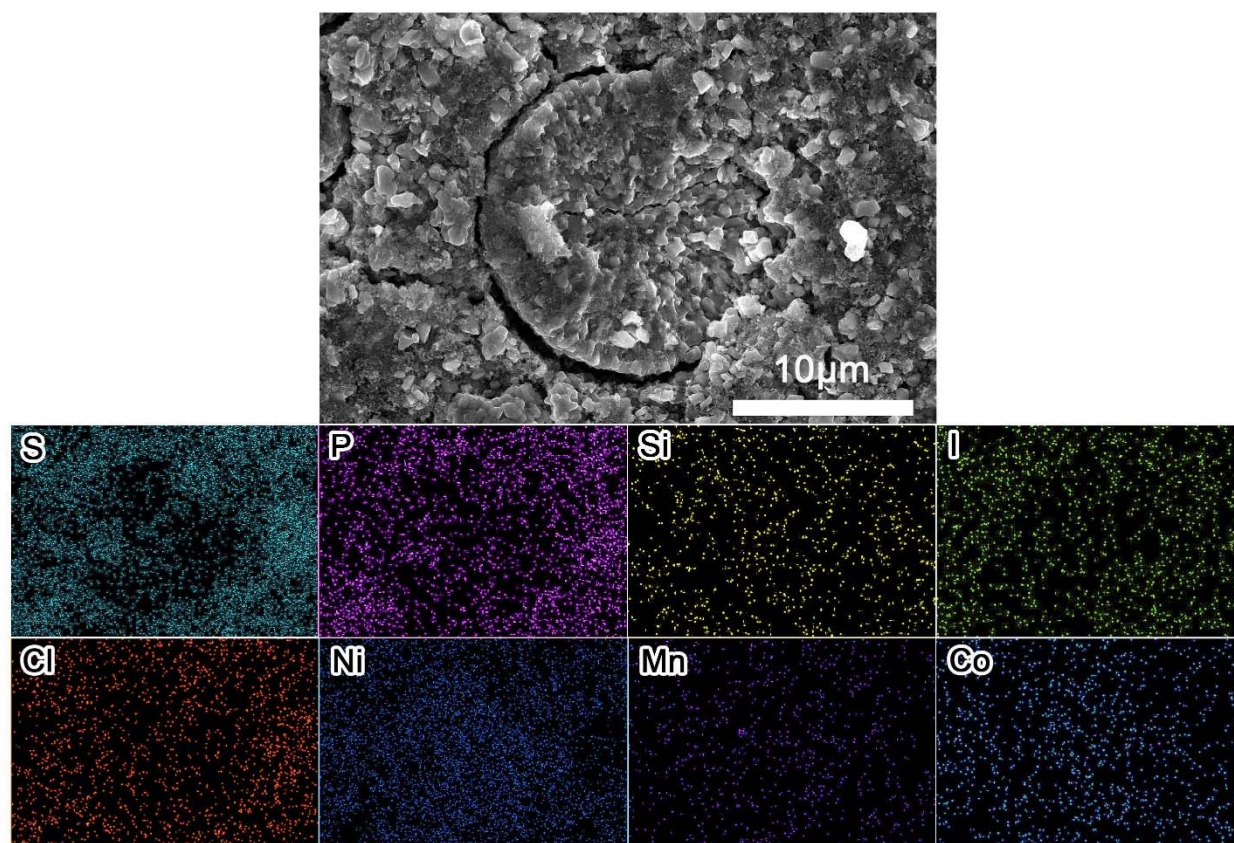

**Figure S9.** The SEM image and the corresponding elemental mappings of the cathode at the interface of  $\text{Li}_{6.55}\text{P}_{0.45}\text{Si}_{0.55}\text{S}_5\text{I}$  SE/NCM.



**Table S1.** The extracted values of ionic conductivity and activation energy from Figure 3d.

| $x$ in $\text{Li}_{6+x}\text{P}_{1-x}\text{Si}_x\text{S}_5\text{I}$ | Ionic conductivity ( $\text{mS cm}^{-1}$ ) | Activation energy (eV) |
|---------------------------------------------------------------------|--------------------------------------------|------------------------|
| 0                                                                   | 0.00023                                    | 0.73 / 0.76            |
| 0.1                                                                 | 0.0028                                     | 0.62 / 0.63            |
| 0.2                                                                 | 0.021                                      | 0.38 / 0.46            |
| 0.3                                                                 | 0.12                                       | 0.32                   |
| 0.4                                                                 | 0.53                                       | 0.24                   |
| 0.5                                                                 | 0.66                                       | 0.26                   |
| 0.55                                                                | 1.1                                        | 0.19                   |
| 0.6                                                                 | 0.48                                       | 0.27                   |
